# Supplementary material for: Host Availability, Repulsive Companion Planting, and Predation Interact and Shape How a Parthenogenetic Aphid Population Responds to a Stratified Ecological Challenge
Source: Preprints.org preprint supplement (doi:10.20944/preprints202001.0140.v1), 2020-01-13
Supplement: Supplementary file 1 [file supplementary]

1 **Supplementary Material**

2

3 **Host availability, repulsive companion planting, and predation interact and shape how a**  
4 **parthenogenetic aphid population responds to a stratified ecological challenge**

5 Mouhammad Shadi Khudr<sup>1,\*</sup>, Lea Fliegner<sup>2,\*</sup>, Oksana Y. Buzhdygan<sup>2</sup>, Samuel Alexander Purkiss<sup>1</sup>

6 <sup>1</sup>Faculty of Biology, Medicine and Health, The University of Manchester, Michael Smith Building, M13  
7 9PT, Manchester, UK

8 <sup>2</sup>Institute of Biology, Freie Universität Berlin, Altensteinstraße 34, 14195 Berlin, Germany

9 \*These two authors contributed equally to this work.

10

11 **Corresponding author**

12 Mouhammad Shadi Khudr scholia\_1@tutanota.com

13

14 **Running title:** Multiple bio-stressors alter aphid fitness

15

16

17

18

19

20

21

22

23

24

25

26

27

28

29

30

31

32 **Table S1. Experimental design.** The first column details the seven levels of experimental environment  
 33 in the absence/presence of predator. The environmental context in *Experiment I* is defined as the different  
 34 numbers of shallots (signifying a variable shallot perturbation effect) to the available savoy cabbage host  
 35 numbers per microcosm, with and without predation. The context in *Experiment II* is defined as the  
 36 different numbers of available savoy cabbage hosts per microcosm, with and without predation. There  
 37 were always four plants in the microcosm. In total, we applied 7 different environments, with and without  
 38 predator presence, resulting in 14 treatments and 87 microcosms.

| Environment                                                     | No. of replicates | Predator<br>(Lacewing absence [aphids alone] = 0, Lacewing present = 1) |
|-----------------------------------------------------------------|-------------------|-------------------------------------------------------------------------|
| <b><i>Experiment I (Shallot perturbation, +/- predator)</i></b> |                   |                                                                         |
| <b>0% Shallot</b>                                               | 6                 | 0                                                                       |
| (0 Shallot: 4 Cabbage hosts)                                    | 6                 | 1                                                                       |
| <b>25% Shallot</b>                                              | 6                 | 0                                                                       |
| (1 Shallots : 3 Cabbage hosts)                                  | 6                 | 1                                                                       |
| <b>50% Shallot</b>                                              | 6                 | 0                                                                       |
| (2 Shallots : 2 Cabbage hosts)                                  | 6                 | 1                                                                       |
| <b>75% Shallot</b>                                              | 6                 | 0                                                                       |
| (3 Shallots : 1 Cabbage host)                                   | 6                 | 1                                                                       |
|                                                                 |                   |                                                                         |
| <b><i>Experiment II (Host gradient, +/- predator)</i></b>       |                   |                                                                         |
| 4-Cabbage                                                       | 6                 | 0                                                                       |
| (4 Cabbage hosts)                                               | 6                 | 1                                                                       |
| 3-Cabbage                                                       | 5                 | 0                                                                       |
| (3 Cabbage hosts)                                               | 4                 | 1                                                                       |
| 2-Cabbage                                                       | 4                 | 0                                                                       |
| (2 Cabbage hosts)                                               | 5                 | 1                                                                       |
| 1-Cabbage                                                       | 4                 | 0                                                                       |
| (1 Cabbage host)                                                | 5                 | 1                                                                       |

39  
40  
41  
42  
43  
44  
45  
46  
47  
48  
49  
50  
51  
52  
53  
54  
55  
56  
57  
58  
59  
60  
61  
62  
63  
64  
65  
66  
67  
68  
69  
70  
71

72 *Note 1. Extra information and further contrasts on aphid aggregative abundance and dispersion,*  
73 *Experiment I: Effects escalated shallot perturbation, predator presence, and PDB*

74 On the one hand, *in predator absence*, aphids were least abundant ( $103 \pm 28.84$  SEM) in the 75%  
75 Shallot context, while they were most abundant ( $215.33 \pm 52.87$  SEM) in the 25% Shallot context (1  
76 Shallot : 3 Cabbage). Overall, ranking of aphid abundance relative to Shallot perturbation, minus  
77 predator, revealed that the abundance ( $103 \pm 11.77$  SEM) under the highest perturbation (75% Shallot  
78 context) was ~38% smaller than the abundance in the context 50% Shallot (with 11% smaller PDB);  
79 ~52% smaller than the abundance in the context 25% Shallot (with 30% smaller PDB); whereas, the  
80 abundance in the context 50% Shallot was ~23% smaller than in the context 25% Shallot (with 22%  
81 smaller PDB). This suggests an increasing negative impact, via escalating shallot perturbation and  
82 decreasing availability of cabbage-host biomass, on aphid population when the predator was absent,  
83 Supplementary Material (Table S2). The rates of decrease in aphid abundance were the most pronounced  
84 in the contrast (75% Shallot *versus* 25% Shallot), followed by (75% Shallot *versus* 50% Shallot).  
85 However, the rates of PDB decrease were the highest in the contrast (75% Shallot *versus* 25% Shallot),  
86 followed by (50% Shallot *versus* 25% Shallot). Interestingly, the decrease rates are on par for PDB and  
87 aphid abundance when the context 50% Shallot is compared with the context 25% Shallot; see  
88 Supplementary Material (Table S2) for further contrasts including comparisons with the optimal  
89 predator-free context 0% Shallot (0 Shallot : 4 Cabbage).

90 On the other hand, *in predator presence*, aphids were least abundant ( $75.33 \pm 21.02$  SEM) in the  
91 75% Shallot context, while they were most abundant ( $184.67 \pm 72.58$  SEM) in the 25% Shallot context.  
92 Overall, ranking aphid abundance relative to shallot perturbation, plus predator, reveals that the  
93 abundance under the highest perturbation (75% shallot context) was ~32% smaller than the abundance of  
94 the context 50% shallot (with 13% larger PDB); ~59% smaller than the abundance of the context 25%  
95 shallot (with 25% larger PDB); whereas, the abundance of the context 50% Shallot was ~40% smaller  
96 than that of the context 25% Shallot (with 10% larger PDB). As such, a similar trend to the observations  
97 in the above-mentioned predator-free cases can be seen but, however, the negative impact on aphid  
98 abundance was more pronounced in the contexts 75% Shallot and 50% Shallot when respectively  
99 compared to the 25% Shallot context, main text (Fig. 1) and Supplementary Material (Table S2). PDB =  
100 cabbage host plant dry biomass.

101  
102  
103  
104  
105  
106  
107  
108  
109  
110  
111  
112

113 **Table S2. Contextual comparisons in *Experiment I*.** The first column details within-context and  
 114 between-contexts contrasts. The second column displays aphid abundance change per centum (larger or  
 115 smaller in the focal context relative to the compared one). The third column shows host-plant dry  
 116 biomass (PDB) change per centum (larger or smaller in the focal context relative to the compared one).  
 117 Experiment I is an investigation of aphid abundance as function of the effects of PDB and predator  
 118 presence under escalated shallot perturbation from 0% Shallot (optimal) to 75% Shallot (most hostile) in  
 119 the microcosm, Pred-free = predator absent from the microcosm, +Pred = predator present in the  
 120 microcosm.

| Context Comparison                                                              | Abundance change%  | PDB change%       |
|---------------------------------------------------------------------------------|--------------------|-------------------|
| <b>+Pred compared to Pred-Free, context 0% Shallot Optimal (4 Cabbage)</b>      | 73% Smaller        | <b>2% Larger</b>  |
| <b>+Pred compared to Pred-Free, context 25% Shallot (1 Shallot : 3 Cabbage)</b> | 14% Smaller        | 26% Smaller       |
| <b>+Pred compared to Pred-Free, context 50% Shallot (2 Shallot : 2 Cabbage)</b> | 33% Smaller        | <b>5% Larger</b>  |
| <b>+Pred compared to Pred-Free, context 75% Shallot (3 Shallot : 1 Cabbage)</b> | 27% Smaller        | <b>33% Larger</b> |
| <b>Pred-Free [(25% Shallot ) compared to (0% Shallot Optimal)]</b>              | 42% Smaller        | 2% Smaller        |
| <b>+Pred [(25% Shallot ) compared to (0% Shallot Optimal)]</b>                  | <b>84% Larger</b>  | 29% Smaller       |
| <b>+Pred (25% Shallot ) compared to <b>Pred-Free</b> (0% Shallot Optimal)</b>   | ~50% Smaller       | 27% Smaller       |
| <b>Pred-Free (25% Shallot ) compared to <b>+Pred</b> (0% Shallot Optimal)</b>   | <b>115% Larger</b> | 5% Smaller        |
| <b>Pred-Free [(50% Shallot) compared to (0% Shallot Optimal)]</b>               | 55% Smaller        | 24% Smaller       |
| <b>+Pred [(50% Shallot) compared to (0% Shallot Optimal)]</b>                   | <b>11% Larger</b>  | 22% Smaller       |
| <b>+Pred (50% Shallot) compared to <b>Pred-Free</b> (0% Shallot Optimal)</b>    | 70% Smaller        | 20% Smaller       |
| <b>Pred-Free (50% Shallot) compared to <b>+Pred</b> (0% Shallot Optimal)</b>    | <b>65% Larger</b>  | 26% Smaller       |
| <b>Pred-Free [(75% Shallot) compared to (0% Shallot Optimal)]</b>               | 72% Smaller        | 32% Smaller       |
| <b>+Pred [(75% Shallot) compared to (0% Shallot Optimal)]</b>                   | 25% Smaller        | 12% Smaller       |
| <b>+Pred (75% Shallot) compared with <b>Pred-Free</b> (0% Shallot Optimal)</b>  | 80% Smaller        | 10% Smaller       |
| <b>Pred-Free (75% Shallot) compared to <b>+Pred</b> (0% Shallot Optimal)</b>    | <b>3% Larger</b>   | 34% Smaller       |
| <b>Pred-Free [(50% Shallot) compared to (25% Shallot)]</b>                      | 23% Smaller        | 22% Smaller       |
| <b>+Pred [(50% Shallot) compared to (25% Shallot)]</b>                          | 40% Smaller        | <b>10% Larger</b> |
| <b>+Pred (50% Shallot) compared to <b>Pred-Free</b> (25% Shallot)</b>           | 48% Smaller        | 18% Smaller       |
| <b>Pred-Free (50% Shallot) compared with <b>+Pred</b> (25% Shallot)</b>         | 10% Smaller        | <b>5% Larger</b>  |
| <b>Pred-Free [(75% Shallot) compared to (50% Shallot)]</b>                      | 38% Smaller        | 11% Smaller       |
| <b>+Pred [(75% Shallot) compared to (50% Shallot)]</b>                          | 32% Smaller        | <b>13% Larger</b> |
| <b>+Pred (75% Shallot) compared to <b>Pred-Free</b> (50% Shallot)</b>           | 55% Smaller        | <b>19% Larger</b> |
| <b>Pred-Free (75% Shallot) compared to <b>+Pred</b> (50% Shallot)</b>           | 7% Smaller         | 15% Smaller       |
| <b>Pred-Free [(75% Shallot) compared to (25% Shallot)]</b>                      | 52% Smaller        | 30% Smaller       |
| <b>+Pred [(75% Shallot) compared to (25% Shallot)]</b>                          | 59% Smaller        | <b>25% Larger</b> |
| <b>+Pred (75% Shallot) compared to <b>Pred-Free</b> (25% Shallot)</b>           | 65% Smaller        | 7% Smaller        |
| <b>Pred-Free (75% Shallot) compared to <b>+Pred</b> (25% Shallot)</b>           | 44% Smaller        | 6+% Smaller       |

121  
 122  
 123

**Table S3. Test of cabbage dry biomass in *Experiment I*.** The main effects, via analysis of deviance table (Type II tests), are shown regarding the generalised linear model, with Gaussian family, to test cabbage dry biomass in the microcosm as explained by shallot density (0% Shallot [0 Shallot : 4 Cabbage], 25% Shallot [1 Shallot : 3 Cabbage], 50% Shallot [2 Shallot : 2 Cabbage], 75% Shallot [3 Shallot : 1 Cabbage]), and predator presence (0 or 1), and the interaction between shallot density and predator presence. There were always four plants in the microcosm.

| Variable                            | Cabbage dry biomass           |
|-------------------------------------|-------------------------------|
| Predator presence                   | $F_{(1,40)}=0.01$ ; $P=0.927$ |
| Shallot density                     | $F_{(3,40)}=2.54$ ; $P=0.07$  |
| Predator presence x Shallot density | $F_{(3,40)}=2.03$ ; $P=0.124$ |

**Table S4. Test of aphid polyphenism in *Experiment I*.** The main effects, via analysis of deviance table (Type II tests), are shown regarding the generalised linear model, with quasiPoisson family, applied to test percentage of alata production (indicating polyphenism) in the microcosm as explained by shallot perturbation (0% Shallot [0 Shallot : 4 Cabbage], 25% Shallot [1 Shallot : 3 Cabbage], 50% Shallot [2 Shallot : 2 Cabbage], 75% Shallot [3 Shallot : 1 Cabbage]), predator presence (0 or 1), and cabbage host-plant dry biomass (PDB), and all possible interactions between the said explanatory variables. There were always four plants in the microcosm. Significant results are shown in bold.

| Variable                                       | Aphid dispersion                                |
|------------------------------------------------|-------------------------------------------------|
| Host-plant dry biomass (PDB)                   | $F_{(1,32)}=1.17$ ; $P=0.287$                   |
| Shallot perturbation                           | $F_{(3,32)}=6.42$ ; <b><math>P=0.002</math></b> |
| Predator presence                              | $F_{(1,32)}=0.34$ ; $P=0.564$                   |
| PDB x Shallot perturbation                     | $F_{(3,32)}=1.83$ ; $P=0.161$                   |
| PDB x Predator presence                        | $F_{(1,32)}=0.49$ ; $P=0.49$                    |
| Shallot perturbation x Predator presence       | $F_{(3,32)}=1.58$ ; $P=0.213$                   |
| PDB x Shallot perturbation x Predator presence | $F_{(3,32)}=1.02$ ; $P=0.397$                   |

165 Note 2. Extra information and further contrasts on aphid aggregative abundance and dispersion,  
166 Experiment II: Effects of decreasing host plant availability, predator presence, and PDB

167 On the one hand, *in predator absence*, the least aphid abundance ( $81.25 \pm 23.61$  SEM) was  
168 observed in the 1-Cabbage context, while the most aphid abundance ( $798.2 \pm 77.73$  SEM) was observed  
169 in the 3-Cabbage context. Overall, comparing aphid abundance in the least hospitable and nourishing  
170 1-Cabbage context to variable host plant availabilities, minus predator, revealed that the 1-Cabbage  
171 context had 78% smaller abundance (with 2% larger PDB) than in the optimal 4-Cabbage context, 90%  
172 smaller abundance (with 6% smaller PDB) than in the 3-Cabbage context; 78% smaller abundance (with  
173 17% smaller PDB) than in the 2-Cabbage context. Whereas the abundance in the 2-Cabbage context was  
174 53% smaller (with 14% larger PDB) than in the 3-Cabbage context; and 1+% larger in abundance (with  
175 23% larger PDB) than in the optimal 4-Cabbage context. Note that the abundance in the 3-Cabbage  
176 context was 116% larger (with 7% larger PDB) than in the optimal 4-Cabbage context. Comparatively,  
177 the PDB values of all contexts, except the optimal 4-Cabbage, were larger than the PDB of the 1-Cabbage  
178 context, and aphids were more abundant in all contexts when there were more than 1 cabbage in the  
179 microcosm, (Fig. 2) and Supplementary Material (Table S5). To our surprise, in the 3-Cabbage context,  
180 without predator, the PDB value (5<sup>th</sup> rank) was high notwithstanding the sharp increase in aphid  
181 abundance in this context, (Fig. 2) and Supplementary Material (Table S5) for further contrasts when the  
182 predator was absent. In the absence of predator, there was a notable margin of PDB difference when the  
183 contextual contrast (1-Cabbage *versus* 3-Cabbage) is compared with (2-Cabbage *versus* 3-Cabbage).

184 On the other hand, *in predator presence*, the least aphid abundance ( $59.25 \pm 27.27$  SEM) was  
185 observed in the 3-Cabbage context, while the most aphid abundance ( $241 \pm 96.95$  SEM) was observed in  
186 the 1-Cabbage context. Overall, comparing aphid abundance in the least hospitable and nourishing  
187 1-Cabbage context with other host availabilities, plus predator, shows that the abundance in the said  
188 context was ~140% larger (with ~80% larger PDB) than in the optimal 4-Cabbage context, ~307% larger  
189 (with 65% smaller PDB) in the 3-Cabbage context; ~3% larger (with ~17% smaller PDB) than in the  
190 2-Cabbage context. Whereas the abundance in the 2-Cabbage context was ~294% larger (with ~37%  
191 larger PDB) than in the 3-Cabbage context; the abundance in the 2-Cabbage context was ~133% larger  
192 (with ~50% larger PDB) than in the optimal 4-Cabbage context; and the abundance in the 3-Cabbage  
193 context was ~41% smaller (with ~9% larger PDB) than in the optimal 4-Cabbage context. The increases  
194 in abundance were smaller in the contextual contrast (1-Cabbage *versus* 2-Cabbage) than what was  
195 observed for the contrasts (1-Cabbage *versus* 3-Cabbage) and (2-Cabbage *versus* 3-Cabbage). Further,  
196 compared to the 3-Cabbage and 4-Cabbage contexts, clearly there was more PDB (provision for aphid),  
197 accompanied by larger aphid abundances, in the microcosms of the 1-Cabbage and 2-Cabbage contexts  
198 despite having fewer hosts (smaller host densities). In the predator-free microcosm, the production of  
199 alates peaked in the 3-Cabbage context which had the highest aphid abundance and relatively good  
200 cabbage biomass of the 5<sup>th</sup> rank. This was followed by the 2-Cabbage context (more than two times  
201 smaller abundance and ~1.14 times the PDB of the value recorded in the 3-Cabbage context), then the  
202 optimal 4-Cabbage context (more than two times smaller abundance and ~0.93 times the PDB of the  
203 value in the 3-Cabbage context); whereas alates were lacking in the 1-Cabbage context (9.85 times  
204 smaller abundance and ~0.94 times the PDB compared to the 3-Cabbage context). By contrast, when the  
205 predator was available, the largest alata proportions were observed in the 1-Cabbage context followed by  
206 the 3-Cabbage context, as there were proportionally more alata production relative to population size in  
207 these contexts. Apparently, predator presence induced less alates (in the 2-Cabbage context) or no alates  
208 at all (in the 4-Cabbage context) compared to the 1-Cabbage and the 3-Cabbage contexts, as offspring  
209 conditioning into winged morphs varied by context contingent on predation, and the interaction of  
210 predation effect with cabbage density or biomass, (Fig. 2). Moreover, when comparing the optimal

211 4-Cabbage with the other contexts, the biggest difference is seen in contrast with the 3-Cabbage context  
212 (when the predator was absent) and with the 1-Cabbage context (when the predator was present); PDB =  
213 cabbage host-plant dry biomass.

214  
215  
216  
217  
218  
219  
220  
221  
222  
223  
224  
225  
226  
227  
228  
229  
230  
231  
232  
233  
234  
235  
236  
237  
238  
239  
240  
241  
242  
243  
244  
245  
246  
247  
248  
249  
250  
251  
252

253 **Table S5. Contextual comparisons in *Experiment II*.** The first column details within-context and  
254 between-contexts contrasts. The second column displays aphid abundance change per centum (larger or

255 smaller of the focal context relative to the compared one). The third column shows host-plant dry  
 256 biomass (PDB) change per centum (larger or smaller of the focal context relative to the compared one).  
 257 Experiment II is an investigation of aphid abundance as function of the effects of PDB and predator  
 258 presence under decreasing cabbage host availability (HPA) in the microcosm (4 Cabbage hosts [optimal],  
 259 3 Cabbage hosts, 2 Cabbage hosts, 1 Cabbage host [least hospitable]), Pred-free = predator absent from  
 260 the microcosm, +Pred = predator present in the microcosm.

| Context Comparison                                         | Abundance change%  | PDB Change%       |
|------------------------------------------------------------|--------------------|-------------------|
| +Pred compared to Pred-Free, context Optimal (4 Cabbage)   | 73% Smaller        | 2% Larger         |
| +Pred compared to Pred-Free, context (3 Cabbage)           | 93% Smaller        | 4% Larger         |
| +Pred compared to Pred-Free, context (2 Cabbage)           | 37% Smaller        | 25% Larger        |
| +Pred compared to Pred-Free, context (1 Cabbage)           | 197% Larger        | 82% Larger        |
| <b>Pred-Free [(3 Cabbage) compared to (Optimal)]</b>       | <b>116% Larger</b> | <b>7% Larger</b>  |
| +Pred [(3 Cabbage) compared to (Optimal)]                  | 41% Smaller        | 9% Larger         |
| +Pred (3 Cabbage) compared to <b>Pred-Free</b> (Optimal)   | 84% Smaller        | 12% Larger        |
| <b>Pred-Free</b> (3 Cabbage) compared to +Pred (Optimal)   | <b>695% Larger</b> | <b>5% Larger</b>  |
| <b>Pre-Free [(2 Cabbage) compared to (Optimal)]</b>        | <b>1+% Larger</b>  | <b>23% Larger</b> |
| +Pred [(2 Cabbage) compared to (Optimal)]                  | 133% Larger        | 50% Larger        |
| +Pred (2 Cabbage) compared to <b>Pred-Free</b> (Optimal)   | 37% Smaller        | 54% Larger        |
| <b>Pred-Free</b> (2 Cabbage) compared to +Pred (Optimal)   | <b>270% Larger</b> | <b>20% Larger</b> |
| <b>Pre-Free [(1 Cabbage) compared to (Optimal)]</b>        | 78% Smaller        | 2% Larger         |
| +Pred [(1 Cabbage) compared to (Optimal)]                  | 140% Larger        | 80% Larger        |
| +Pred (1 Cabbage) compared to <b>Pred-Free</b> (Optimal)   | 35% Smaller        | 85% Larger        |
| <b>Pred-Free</b> (1 Cabbage) compared to +Pred (Optimal)   | 19% Smaller        | 1+% Smaller       |
| <b>Pred-Free [(2 Cabbage) compared to (3 Cabbage)]</b>     | 53% Smaller        | 14% Larger        |
| +Pred [(2 Cabbage) compared to (3 Cabbage)]                | 294% Larger        | 37% Larger        |
| +Pred (2 Cabbage) compared to <b>Pred-Free</b> (3 Cabbage) | 71% Smaller        | 43% Larger        |
| <b>Pred-Free</b> (2 Cabbage) compared to +Pred (3 Cabbage) | <b>527% Larger</b> | <b>10% Larger</b> |
| <b>Pre-Free [(1 Cabbage) compared to (2 Cabbage)]</b>      | 78% Smaller        | 17% Smaller       |
| +Pred [(1 Cabbage) compared to (2 Cabbage)]                | 3% Larger          | 20% Larger        |
| +Pred (1 Cabbage) compared to <b>Pred-Free</b> (2 Cabbage) | 35% Smaller        | 50% Larger        |
| <b>Pred-Free</b> (1 Cabbage) compared to +Pred (2 Cabbage) | 65% Smaller        | 34% Smaller       |
| <b>Pre-Free [(1 Cabbage) compared to (3 Cabbage)]</b>      | 90% Smaller        | 6% Smaller        |
| +Pred [(1 Cabbage) compared to (3 Cabbage)]                | 307% Larger        | 65% Larger        |
| +Pred (1 Cabbage) compared to <b>Pred-Free</b> (3 Cabbage) | 70% Smaller        | 72% Larger        |
| <b>Pred-Free</b> (1 Cabbage) compared to +Pred (3 Cabbage) | <b>37% Larger</b>  | 10% Smaller       |



298 **Table S6. Test of cabbage dry biomass in *Experiment II*.** The main effects, analysis of deviance table  
 299 (Type II tests), are shown regarding the generalised linear model run to test cabbage dry biomass as  
 300 explained by host plant availability (HPA) in the microcosm (4 Cabbage hosts [optimal], 3 Cabbage  
 301 hosts, 2 Cabbage hosts, 1 Cabbage host [least hospitable]), predator presence (0 or 1), and the interaction  
 302 between host availability and predator presence. There were always four plants in the microcosm.  
 303 Significant results are shown in bold.

| Variable                | Cabbage dry biomass               |
|-------------------------|-----------------------------------|
| Predator presence       | $F_{(1,31)}=4.2$ ; <b>P=0.049</b> |
| HPA                     | $F_{(3,31)}=2.58$ ; P=0.071       |
| Predator presence x HPA | $F_{(3,31)}=1.87$ ; P=0.155       |

315 **Table S7. Test of aphid polyphenism in *Experiment II*.** The main effects, via analysis of deviance table  
 316 (Type II tests), are shown regarding the generalised linear model applied to test percentage of alata  
 317 production (indicating polyphenism) in the microcosm as explained by host plant availability (HPA) (4  
 318 Cabbage hosts [optimal], 3 Cabbage hosts, 2 Cabbage hosts, 1 Cabbage host [least hospitable]), predator  
 319 presence (0 or 1), Cabbage host-plant dry biomass (PDB), and all possible interactions between the said  
 320 explanatory variables. There were always four plants in the microcosm. Significant results are shown in  
 321 bold.

| Variable                      | Aphid dispersion                    |
|-------------------------------|-------------------------------------|
| Host-plant dry biomass (PDB)  | $F_{(1,23)}=10.87$ ; <b>P=0.003</b> |
| Host plant availability (HPA) | $F_{(3,23)}=2.95$ ; P=0.054         |
| Predator presence             | $F_{(1,23)}=0.51$ ; P=0.482         |
| PDB x HPA                     | $F_{(3,23)}=1.41$ ; P=0.265         |
| PDB x Predator presence       | $F_{(1,23)}=9.12$ ; <b>P=0.006</b>  |
| HPA x Predator presence       | $F_{(3,23)}=9.52$ ; <b>P=0.0003</b> |
| PDB x HPA x Predator presence | $F_{(3,23)}=2.36$ ; P=0.098         |

338 *Note 3: All-inclusive approach of analysing organism traits under combined stress*

339 In the main text, we split the concept and the analysis of the investigation into two routes, here we  
340 alternatively apply an all-inclusive approach that test aphid traits (aggregative abundance and  
341 polyphenism, respectively) within different contextual scenarios of combined biological stress where the  
342 reference frame (baseline) is the optimal context of four cabbage hosts in predator absence. The first  
343 stressor is decreasing host plant availability (HPA) spanning 4 Cabbage hosts [optimal], 3 Cabbage hosts,  
344 2 Cabbage hosts, and 1 Cabbage host [least hospitable]). The second stressor is increasing perturbation  
345 by shallots ranging from 0% Shallot [0 Shallot : 4 Cabbage, optimal], 25% Shallot [1 Shallot : 3  
346 Cabbage], 50% Shallot [2 Shallot : 2 Cabbage], to 75% Shallot [3 Shallot : 1 Cabbage], most perturbing).  
347 There were always universally, four plants in the microcosm. The third stressor is predator by lacewing;  
348 the pressure on aphid population increases when the predator is present in each of said contexts. This  
349 means that the aphid population resides within the sharpest hostility in the context 75% Shallot with  
350 predator. Cabbage host plant dry biomass (PDB), indicating food availability for the pest, was used as a  
351 covariate to add precision of the analysis of aphid traits under escalated compounded stress.

352 We tested aggregative aphid abundance (a quaternary variable: aphid counts on both sides of the leaf  
353 and on stem and off plant) as function of the mentioned predictors and all their possible interactions by  
354 applying a vectorised generalised linear model (vglm) with multinomial family, R package VGAM (Yee  
355 2015, Yee 2017) and the main effects are shown in an analysis of deviance table using a command of  
356 ANOVA (Type II) irrespective of the order of the predictors in the model.

357 Aphid polyphenism (proportions of produced alates [dispersive morphs denoting polyphenism])  
358 was also tested by applying a generalised linear model with a quasiPoisson family quasi-Poisson family  
359 (due to over-dispersion and non-normal data distribution), R package multcomp (Hothorn *et al.* 2008)  
360 and the main effects are shown using in an analysis of deviance table using an ANOVA (Type II), as  
361 explained above. Additionally, cabbage dry biomass, signifying cabbage well bring in the microcosm,  
362 was examined as function of shallot density, cabbage host availability and predator effect  
363 (absence/presence) and the interactions (cabbage host availability x predator effect, and shallot density x  
364 predator effect), using a generalised linear model with Gaussian family; see Supplementary Material  
365 (Table 9) and (Fig. S2); PDB = cabbage host-plant dry biomass.

366  
367  
368  
369  
370  
371  
372  
373  
374  
375  
376  
377  
378  
379  
380  
381  
382  
383  
384  
385  
386

387 **Table S8. Test of aphid abundance under combined stress.** The main effects, via analysis of deviance  
388 table (Type II tests), are shown regarding a vectorised generalised linear model (vglm) with a multinomial  
389 family, R package VGAM, applied to test aphid abundance in the microcosm as explained by: cabbage host

390 plant dry biomass (PDB), host plant availability (HPA) (4 Cabbage hosts [optimal], 3 Cabbage hosts, 2  
 391 Cabbage hosts, 1 Cabbage host [least hospitable]), shallot perturbation (0% Shallot [0 Shallot : 4  
 392 Cabbage], 25% Shallot [1 Shallot : 3 Cabbage], 50% Shallot [2 Shallot : 2 Cabbage], 75% Shallot [3  
 393 Shallot : 1 Cabbage]), predator presence (0 or 1), and the interactions (PDB x Shallot perturbation, PDB  
 394 x HPA, PDB x Predator presence, Shallot perturbation x Predator presence, HPA x Predator presence,  
 395 PDB x Shallot perturbation x Predator presence, PDB x HPA x Predator presence). There were always  
 396 four plants in the microcosm. Significant results are shown in bold.

| Variable                                       | Aphid abundance                                        |
|------------------------------------------------|--------------------------------------------------------|
| Host-plant dry biomass (PDB)                   | $F_{(18,141)}=3.78$ ; <b><math>P&lt;0.0001</math></b>  |
| Host plant availability (HPA)                  | $F_{(21,141)}=5.26$ ; <b><math>P&lt;0.0001</math></b>  |
| Shallot perturbation                           | $F_{(11,141)}=10.98$ ; <b><math>P&lt;0.0001</math></b> |
| Predator presence                              | $F_{(17,141)}=8.76$ ; <b><math>P&lt;0.0001</math></b>  |
| PDB x Shallot perturbation                     | $F_{(9,141)}=5.53$ ; <b><math>P&lt;0.0001</math></b>   |
| PDB x HPA                                      | $F_{(10,141)}=5.22$ ; <b><math>P&lt;0.0001</math></b>  |
| PDB x Predator presence                        | $F_{(6,141)}=4.03$ ; <b><math>P=0.0009</math></b>      |
| HPA x Predator presence                        | $F_{(10,141)}=2.79$ ; <b><math>P=0.004</math></b>      |
| Shallot perturbation x Predator presence       | $F_{(9,141)}=4.4$ ; <b><math>P&lt;0.0001</math></b>    |
| PDB x Shallot perturbation x Predator presence | $F_{(9,141)}=1.73$ ; $P=0.087$                         |
| PDB x HPA x Predator presence                  | $F_{(9,141)}=4.34$ ; <b><math>P&lt;0.0001</math></b>   |

**Table S9. Test of aphid polyphenism under combined stress.** The main effects, via analysis of deviance table (Type II tests), are shown regarding a generalised linear model (glm) with a quasi-Poisson family (due to over-dispersion and non-normal data distribution), R package multcomp, applied to test aphid alata proportions (indicating polyphenism) in the microcosm as explained by: cabbage host plant dry biomass (PDB), host plant availability (HPA) (4 Cabbage hosts [optimal], 3 Cabbage hosts, 2 Cabbage hosts, 1 Cabbage host [least hospitable]), shallot perturbation (0% Shallot [0 Shallot : 4 Cabbage], 25% Shallot [1 Shallot : 3 Cabbage], 50% Shallot [2 Shallot : 2 Cabbage], 75% Shallot [3 Shallot : 1 Cabbage]), predator presence (0 or 1), and the interactions (PDB x Shallot perturbation, PDB x HPA, PDB x Predator presence, Shallot perturbation x Predator presence, HPA x Predator presence, PDB x Shallot perturbation x Predator presence, PDB x HPA x Predator presence). There were always four plants in the microcosm. Significant results are shown in bold.

| Variable                                       | Aphid polyphenism                                     |
|------------------------------------------------|-------------------------------------------------------|
| Host-plant dry biomass (PDB)                   | $F_{(1,47)}=41.38$ ; <b><math>P&lt;0.0001</math></b>  |
| Host plant availability (HPA)                  | $F_{(3,47)}=0.91$ ; $P=0.442$                         |
| Shallot perturbation                           | $F_{(3,47)}=150.67$ ; <b><math>P&lt;0.0001</math></b> |
| Predator presence                              | $F_{(1,47)}=560.16$ ; <b><math>P&lt;0.0001</math></b> |
| PDB x Shallot perturbation                     | $F_{(3,47)}=2.37$ ; $P=0.082$                         |
| PDB x HPA                                      | $F_{(10,47)}=0.44$ ; $P=0.727$                        |
| PDB x Predator presence                        | $F_{(1,47)}=0.12$ ; $P=0.735$                         |
| HPA x Predator presence                        | $F_{(3,47)}=2.95$ ; <b><math>P=0.042</math></b>       |
| Shallot perturbation x Predator presence       | $F_{(3,47)}=12.91$ ; <b><math>P&lt;0.0001</math></b>  |
| PDB x Shallot perturbation x Predator presence | $F_{(3,47)}=1.32$ ; $P=0.279$                         |
| PDB x HPA x Predator presence                  | $F_{(3,47)}=0.73$ ; $P=0.539$                         |

**Table S10.**  
**Test of**  
**cabbage**

447 **dry biomass under combined stress of aphids.** The main effects, analysis of deviance table (Type II  
 448 tests), are shown regarding the generalised linear model run to test cabbage dry biomass as explained by  
 449 shallot perturbation effect (0% Shallot [0 Shallot : 4 Cabbage], 25% Shallot [1 Shallot : 3 Cabbage], 50%  
 450 Shallot [2 Shallot : 2 Cabbage], 75% Shallot [3 Shallot : 1 Cabbage]), host plant availability (HPA) in the  
 451 microcosm (4 Cabbage hosts [optimal], 3 Cabbage hosts, 2 Cabbage hosts, 1 Cabbage host [least  
 452 hospitable]), predator presence (0 or 1), and the interactions (Shallot effect x predator presence, HPA x  
 453 predator presence). There were always four plants in the microcosm. Significant results are shown in  
 454 bold.

| Variable                           | Cabbage dry biomass                                 |
|------------------------------------|-----------------------------------------------------|
| Shallot effect                     | $F_{(3,61)}=12.9$ ; <b><math>P&lt;0.0001</math></b> |
| Predator presence                  | $F_{(1,61)}=3.41$ ; $P=0.07$                        |
| HPA                                | $F_{(3,61)}=3.98$ ; <b><math>P=0.012</math></b>     |
| Shallot effect x Predator presence | $F_{(3,61)}=1.95$ ; $P=0.13$                        |
| HPA x Predator presence            | $F_{(3,61)}=2.89$ ; <b><math>P=0.043</math></b>     |

468 **Fig. S1. Assimilation of the effects of the complex stress environmental from an aphid's**  
 469 **perspective.** The infographic provides comparative comparisons and relative understanding of the  
 470 applied complex environmental challenge when the embedding context included 1, 2 or 3 cabbage hosts,  
 471 represented respectively in each triangle part of the big triangle. From an aphid's standpoint the challenge  
 472 was either an added single stressor (shallot or predator) or combined stressors (shallot and predator) to  
 473 the cabbage embedding context. The effects on the aphid population size (abundance) were additive or  
 474 non-additive in a context-dependent fashion. As such, the focus here on 6 different scenarios of stress and  
 475 resulting in 63 microcosms. The the stress is stratified in each context as follows: predation only, shallot  
 476 perturbation (with variable density corresponding to the context), or predation with shallot perturbation  
 477 In the respective contexts, the links between the stressors signal the contrasts: shallot effect *versus*  
 478 predator effect, combined stress [shallot + predator] *versus* shallot effect, combined stress [shallot +  
 479 predator] *versus* predator effect. When an effect is larger than another in said contrasts the part of the link  
 480 emerging from the larger effect is thickened. The shallot effect link is purple, the predator link is orange,  
 481 while the combined stress effect is a mix between the purple and the orange. PDB = cabbage host-plant  
 482 dry biomass; predator = lacewing. This figure is available in the Figshare data repository  
 483 [ <https://figshare.com/s/68f9c1b3f62ac5baf0ae> ].

498 **Fig. S2. All-inclusive illustration of aphid aggregative abundance, polyphenism, and cabbage**  
499 **host-plant dry biomass subject to stratified combined stress from an aphid's position.** From an  
500 aphid's perspective, the infographic provides comparative comparisons of the applied complex  
501 environmental challenge when the embedding context included the following sets of stressors: 0%  
502 Shallot and 100% Cabbage (shallot-free, 4 cabbage hosts [6 replicates with predator, 6 replicates without  
503 predator], 0% Shallot and 75% Cabbage (shallot-free, 3 cabbage hosts [5 replicates with predator, 4  
504 replicates without predator], 25% Shallot and 75% Cabbage (1 shallot : 3 cabbage hosts [6 replicates  
505 with predator, 6 replicates without predator], 0% Shallot and 50% Cabbage (shallot-free, 2 cabbage hosts  
506 [4 replicates with predator, 5 replicates without predator], 50% Shallot and 75% Cabbage (2 shallots : 2  
507 cabbage hosts [6 replicates with predator, 6 replicates without predator], 0% Shallot and 25% Cabbage  
508 (shallot-free, 1 cabbage host [4 replicates with predator, 5 replicates without predator], 75% Shallot and  
509 25% Cabbage (3 shallots : 1 cabbage host [6 replicates with predator, 6 replicates without predator]. At  
510 the bottom of the chart, the context 0% Shallot and 100% Cabbage (minus predator) was the most  
511 hospitable, nourishing and stress-free scenario; whereas, the context 5% Shallot and 25% Cabbage at the  
512 top of the chart was the most hostile, least nourishing, and stress-laden scenario. The bars represent aphid  
513 numerical success as aggregative abundance (mean of total numbers in the microcosm per treatment at  
514 the end of the experiment  $\pm$  SE); the overall average plant dry biomass (PDB $\pm$ SE) per treatment is shown  
515 next the bars in rectangles. In total, we applied 14 different stress scenarios (single stressors [predator or  
516 shallot perturbation] or combined stressors [predator (lacewing) and shallot perturbation]) with variable  
517 perturbation levels, host availabilities and dry biomass in the microcosm. This made the environmental  
518 challenge of aphid reproductive and phenotypic plasticities stratified and elevated by design. The  
519 different proportions of aphid aggregation/spatial distribution on- and off-plant are presented in grades of  
520 grey and all bar stacks are proportional. Each embedding cabbage context (of 1, 2, 3, or 4 host plants) are  
521 aggrouped into with (+) predator and without (-) predator. The respective encircled percentages at the  
522 end of the bars refer to the average proportions of winged aphids (dispersive morphs). This figure is  
523 available in the Figshare data repository [ <https://figshare.com/s/b83f8b101c972e6d7ea6> ].

524  
525  
526  
527  
528  
529  
530  
531

## 532 References

- 533  
534 Hothorn, T., Bretz, F., and Westfall, P. 2008. Simultaneous inference in general parametric models.  
535 *Biometrical Journal*, **50**: 346–363. <https://doi.org/10.1002/bimj.200810425>  
536 RStudio Team. 2016. *RStudio: Integrated Development for R*. RStudio, Inc., Boston, MA.  
537 URL <http://www.rstudio.com/>  
538 Yee T. 2015. *Vector generalized linear and additive models: with an implementation in R*. New York,  
539 USA: Springer.  
540 Yee, T. 2017. VGAM: vector generalized linear and additive models. R package version 1.0-4. URL  
541 <https://CRAN.R-project.org/package=VGAM>
